# Supplementary material for: Proteomic characterization and cytotoxic potential of proteins from Cuscuta (Cuscuta epithymum (L.) crude herbal product against MCF-7 human breast cancer cell line
Source: Springer Nature journal article supplement (doi:10.1186/s12906-024-04495-1), 2024-05-20
Supplement: MOESM2 [file 12906_2024_4495_MOESM2_ESM.pdf]

**Supplementary Information:**

**Proteomic Characterization and Cytotoxic Potential of Proteins from *Cuscuta (Cuscuta epithymum (L.)* Crude Herbal Product Against MCF-7 Human Breast Cancer Cell Line**

Umaima Akhtar<sup>1,3</sup>, Yamna Khurshid<sup>1</sup>, Bishoy El-Aarag<sup>1,2</sup>, Basir Syed<sup>1</sup>, Ishtiaq A. Khan<sup>3</sup>, Keykavous Parang<sup>1</sup>, and Aftab Ahmed<sup>1\*</sup>

1. Biomedical and Pharmaceutical Sciences, Chapman University School of Pharmacy, 9401 Jeronimo Road, Irvine, CA 92618, USA.

2. Biochemistry Division, Chemistry Department, Faculty of Science, Menoufia University, Shebin El-Koom 32512, Egypt

3. Jamil-ur-Rahman Center for Genome Research, International Center for Chemical and Biological Sciences, University of Karachi, Karachi-75270, Pakistan.

\* Corresponding author

Aftab Ahmed  
Chapman University  
School of Pharmacy  
9401 Jeronimo Road Irvine, CA 92618 USA  
Tel: (714) 516-5465  
Fax: (714) 516-5481  
[aahmed@chapman.edu](mailto:aahmed@chapman.edu)

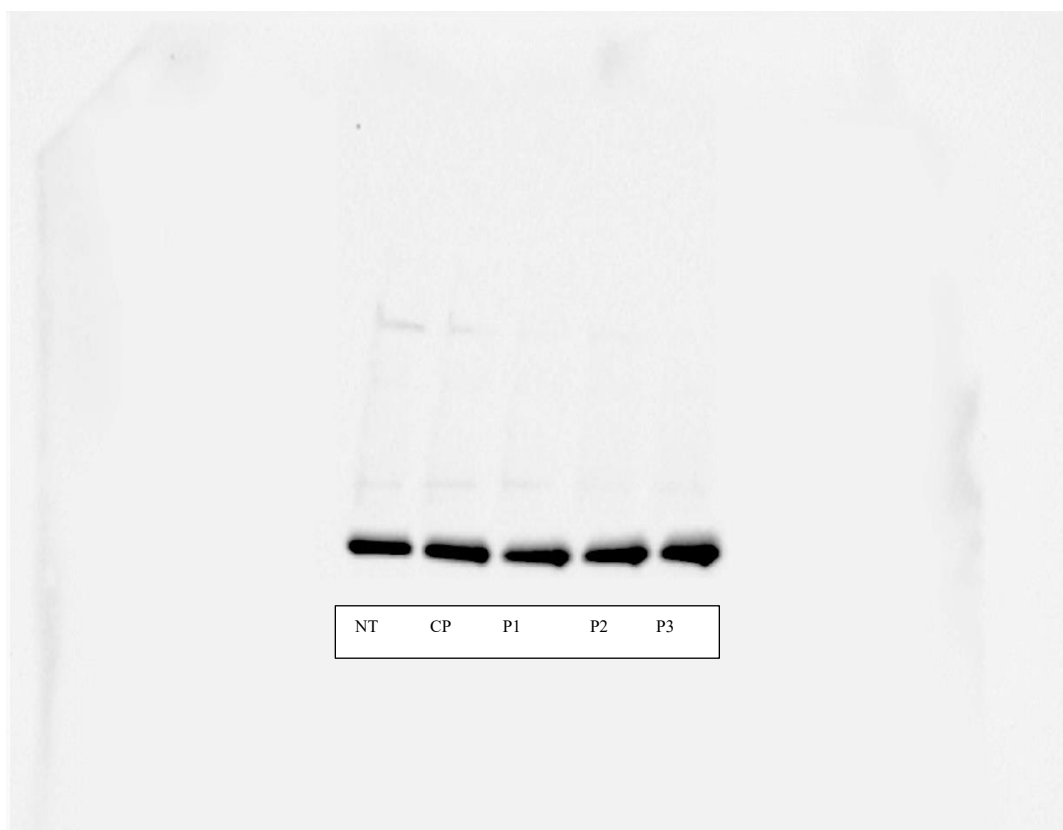

**Figure S1:** Gel/blots image of Bax protein in non-treated (NT) MCF-7 cells and treated with crude protein (CP) and fractions P1, P2, and P3.

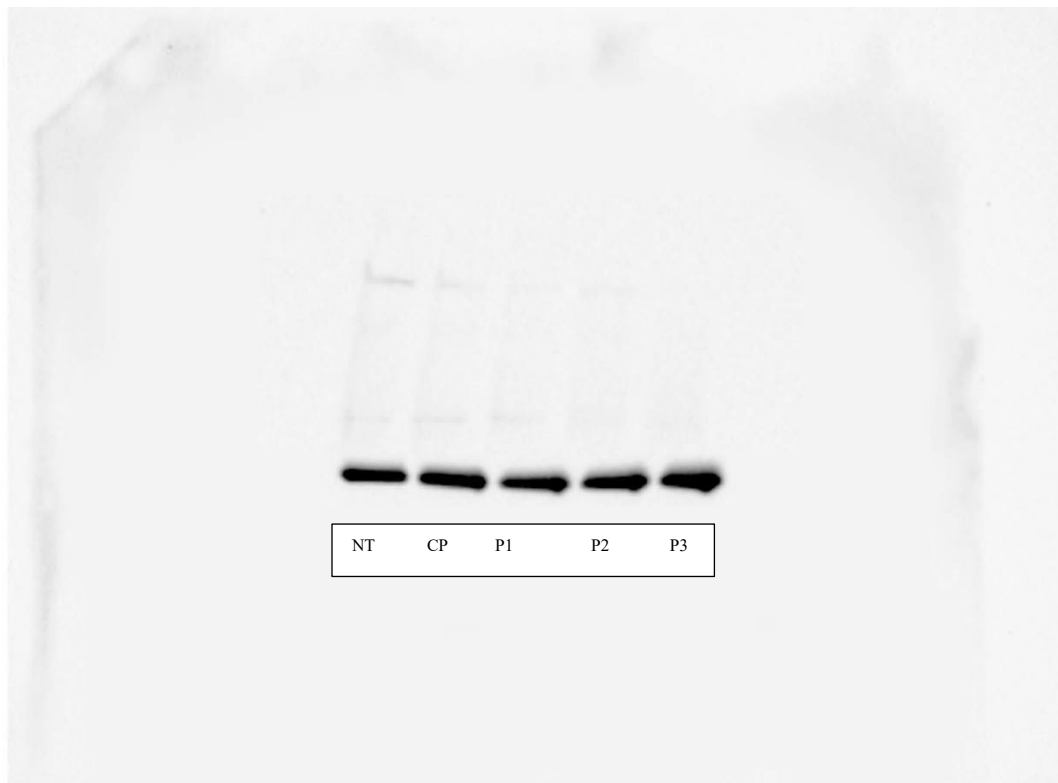

**Figure S2:** Gel/blots image of Bax protein in non-treated (NT) MCF-7 cells and treated with crude protein (CP) and fractions P1, P2, and P3.

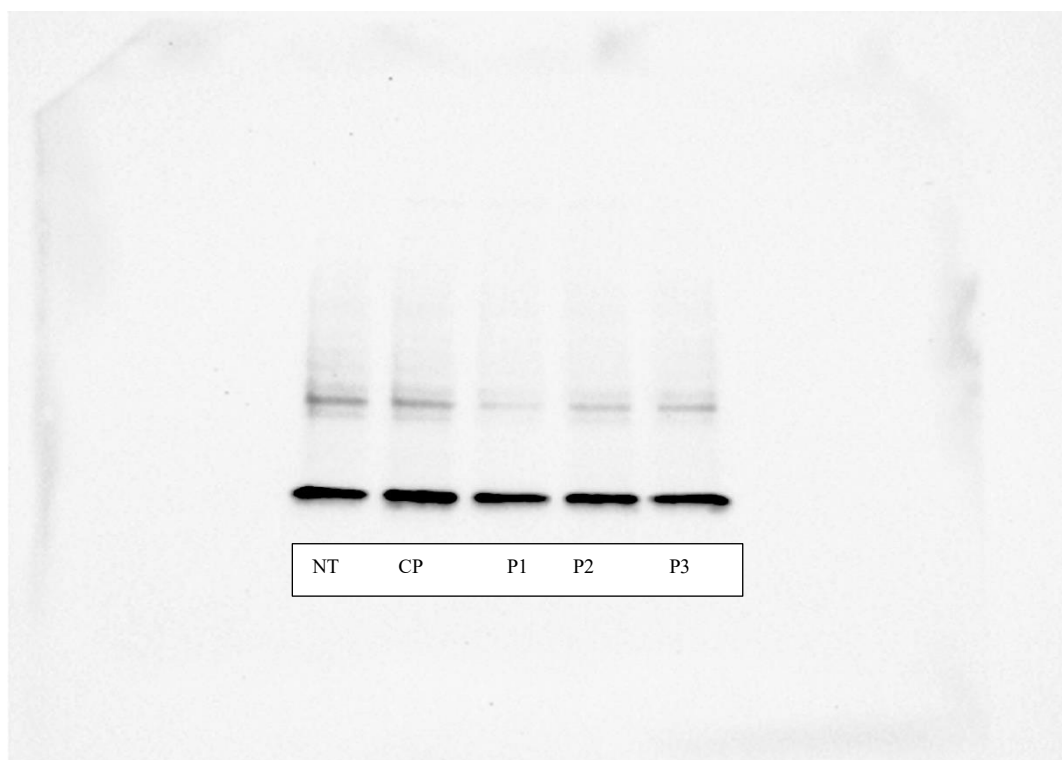

**Figure S3:** Gel/blots image of Bax protein in non-treated (NT) MCF-7 cells and treated with crude protein (CP) and fractions P1, P2, and P3.

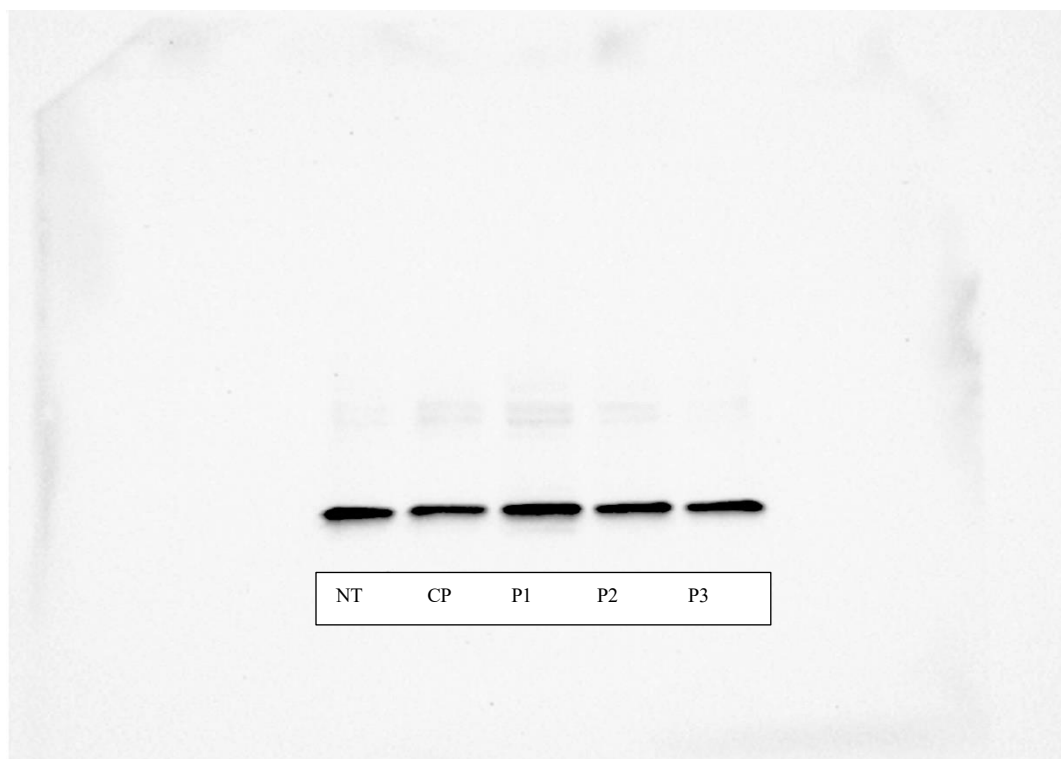

**Figure S4:** Gel/blots image of Bcl-2 protein in non-treated (NT) MCF-7 cells and treated with crude protein (CP) and fractions P1, P2, and P3.

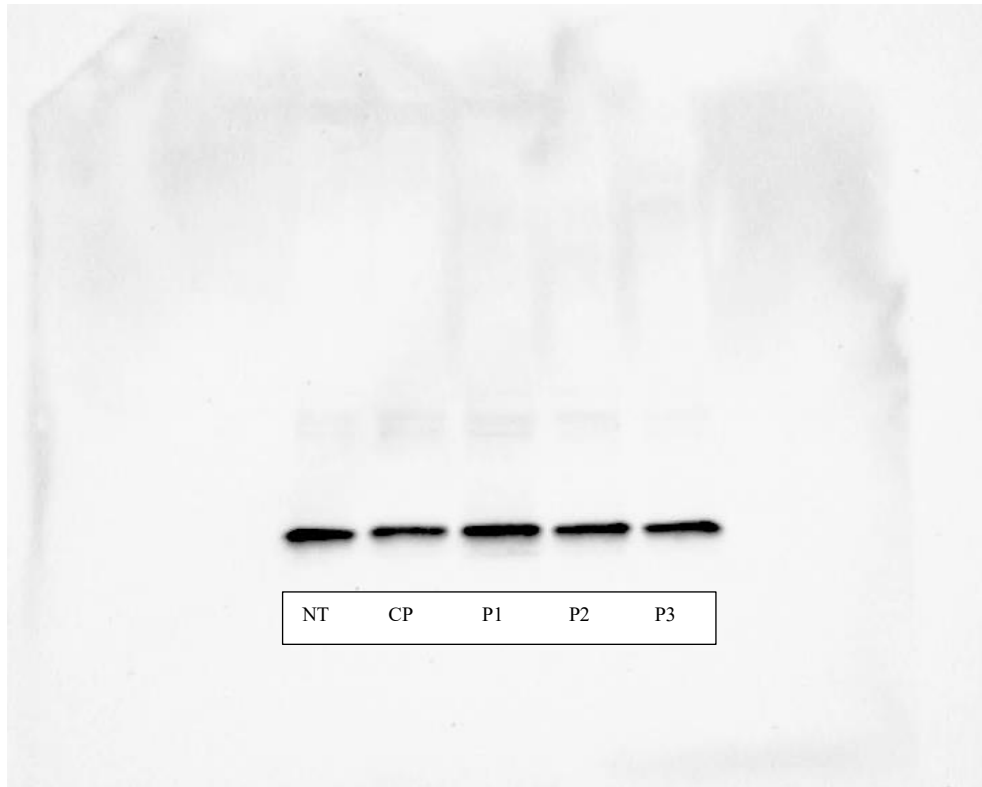

**Figure S5:** Gel/blots image of Bcl-2 protein in non-treated (NT) MCF-7 cells and treated with crude protein (CP) and fractions P1, P2, and P3.

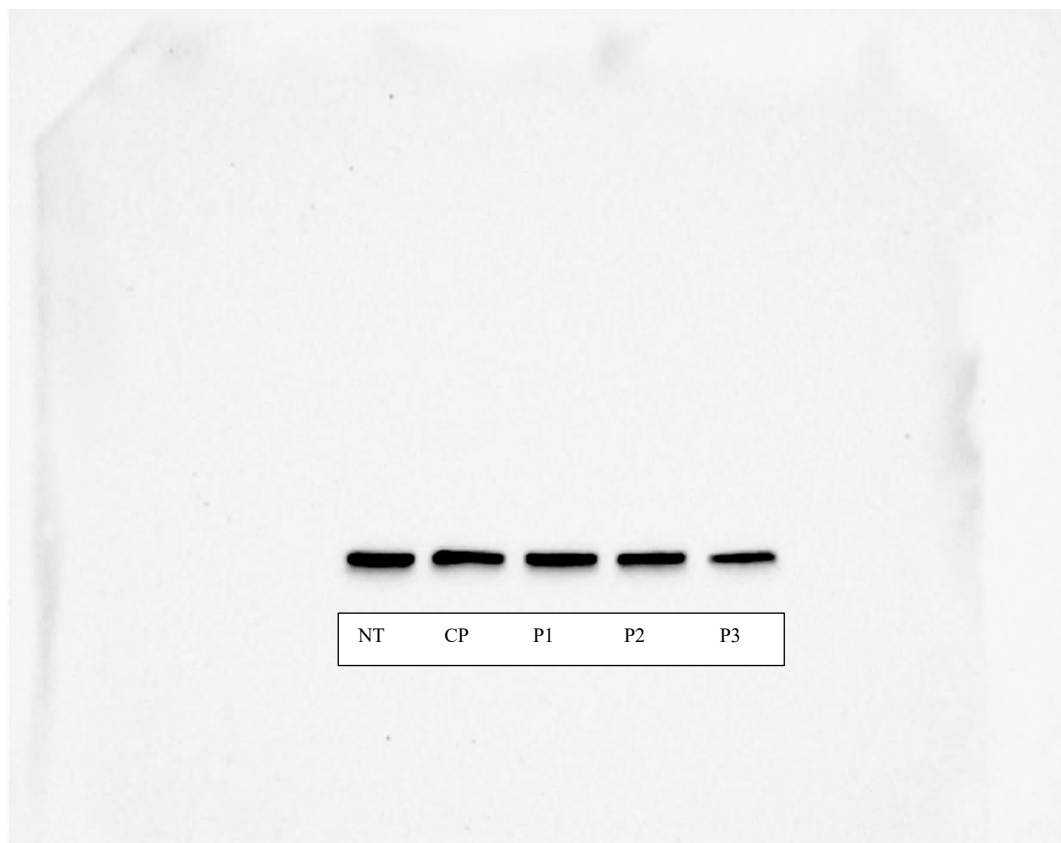

**Figure S6:** Gel/blots image of Bcl-2 protein in non-treated (NT) MCF-7 cells and treated with crude protein (CP) and fractions P1, P2, and P3.

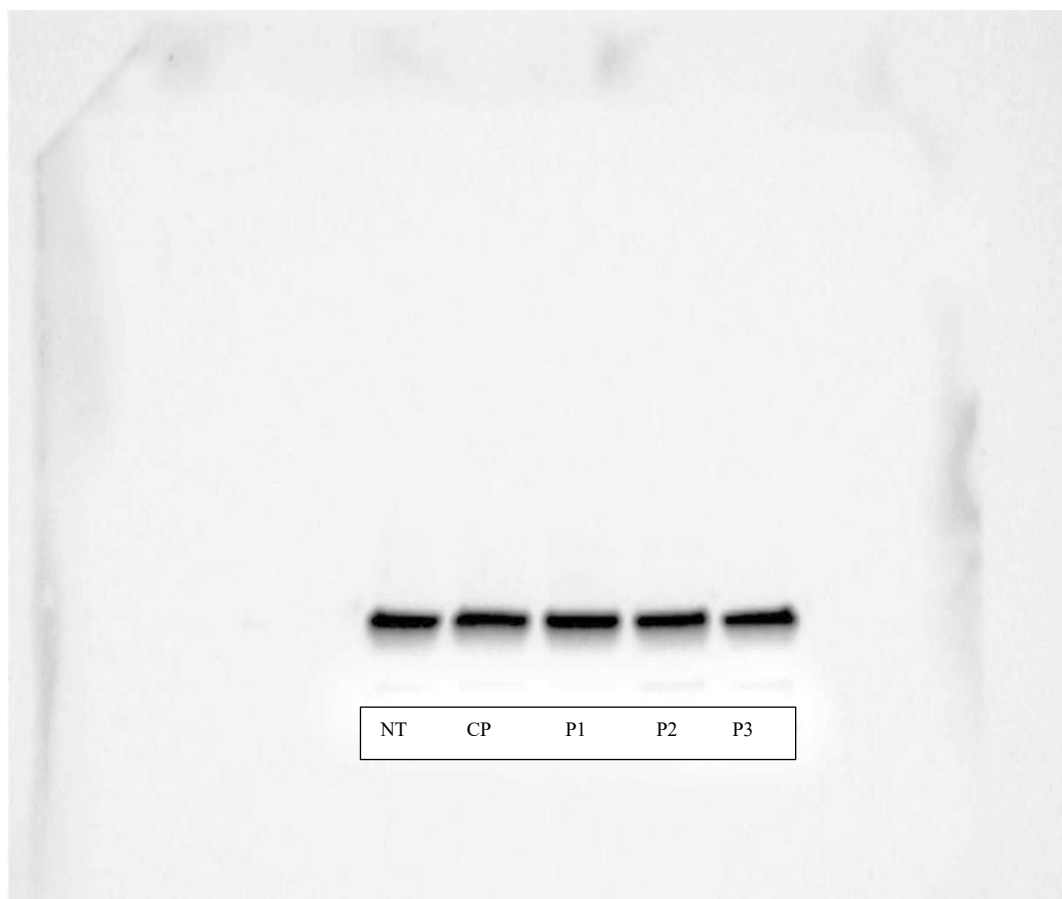

**Figure S7:** Gel/blots image of GAPDH protein in non-treated (NT) MCF-7 cells and treated with crude protein (CP) and fractions P1, P2, and P3.



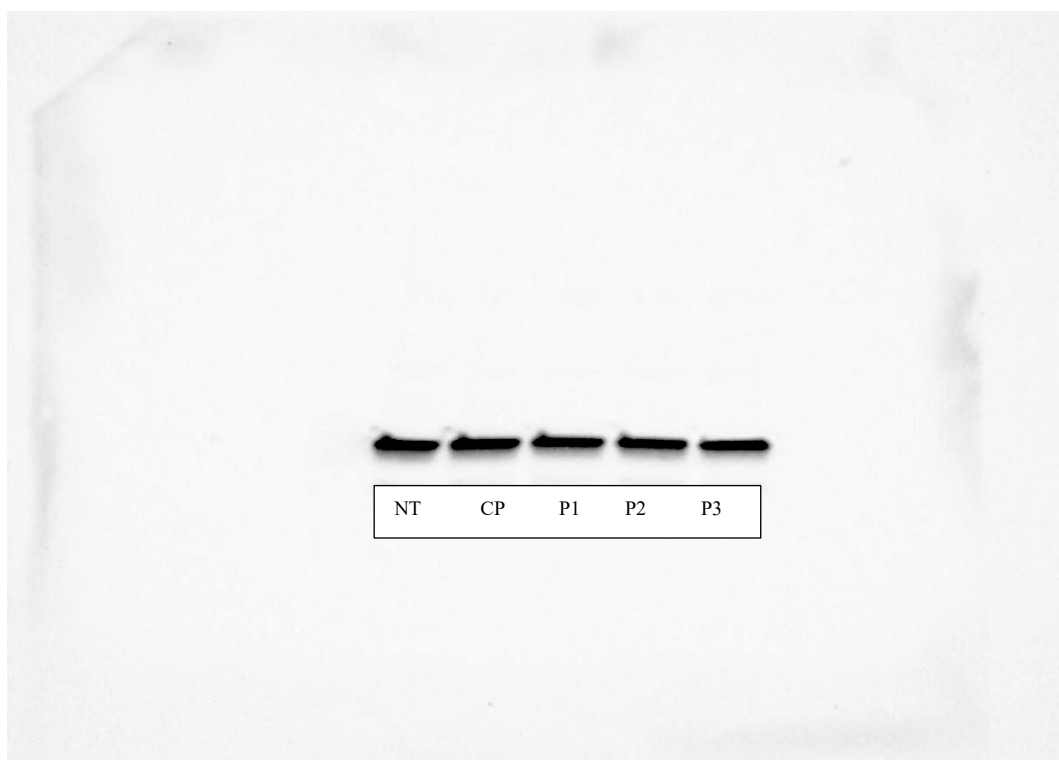

**Figure S8:** Gel/blots image of GAPDH protein in non-treated (NT) MCF-7 cells and treated with crude protein (CP) and fractions P1, P2, and P3.

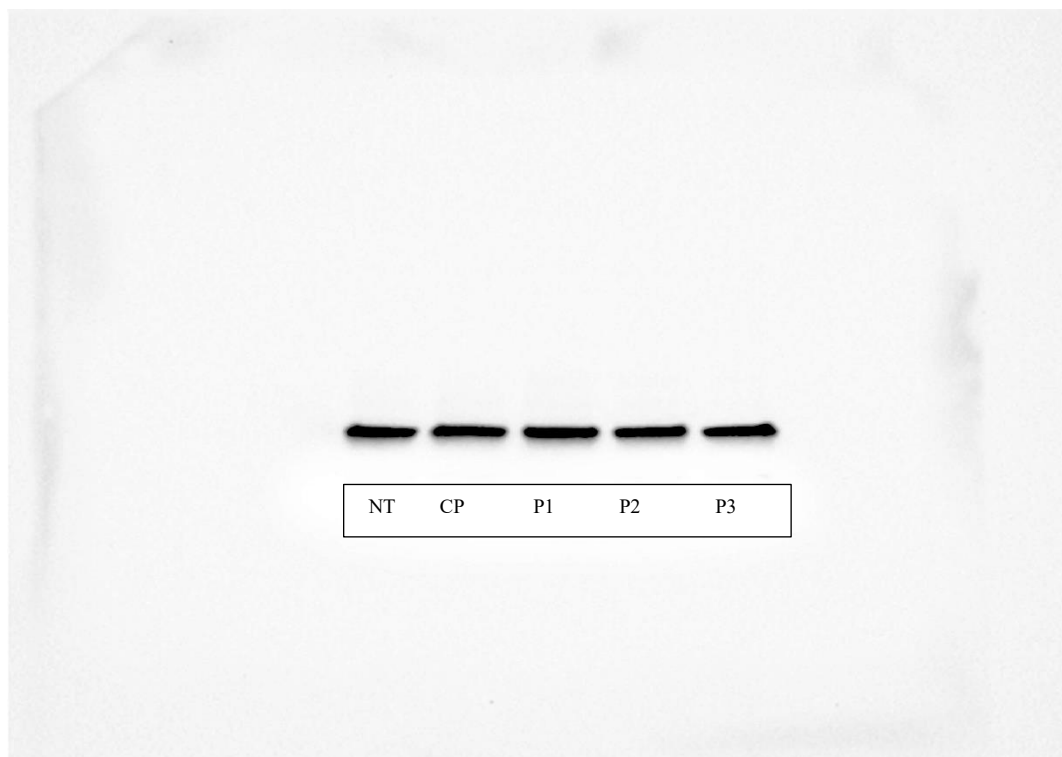

**Figure S9:** Gel/blots image of GAPDH protein in non-treated (NT) MCF-7 cells and treated with crude protein (CP) and fractions P1, P2, and P3.
